# Supplementary material
Source: publisher figshare collection journal article supplement (https://tandf.figshare.com/ndownloader/files/17819855)
Supplement: Supplementary file 1 [file 17819855]

## Supplemental data to *Efficient hyper-parameter determination for regularised linear BRDF parameter retrieval*

### 1. Solution of the Tikhonov Smoothing Equation

To solve the Tikhonov smoothing equation  $(\mathbf{K}^T\mathbf{K} + \lambda^2\mathbf{B}^T\mathbf{B})\mathbf{f} = \mathbf{K}^T\boldsymbol{\rho}$ , subject to  $\|\boldsymbol{\epsilon}\| = n\delta^2$ , we apply the Generalised Singular Value Decomposition (GSVD) to the matrix pair  $(\mathbf{K}, \mathbf{B})$ , where it is assumed  $\mathbf{K} \in \mathbb{R}^{m \times n}$  and  $\mathbf{B} \in \mathbb{R}^{p \times n}$ . The Generalised Singular Value Decomposition has been defined elsewhere (Bai 1992; Hansen 1992; Hansen and O’Leary 1993; Hansen 1996; Golub and Van Loan 2014) and implemented in LAPACK (Anderson et al. 1999). The GSVD decompositions are used to calculate  $\mathbf{f}$ ,  $\|\mathbf{B}\mathbf{f}\|$  and  $\|\boldsymbol{\epsilon}\|$ .

The GSVD computes the simultaneous decompositions  $\mathbf{K} = \mathbf{U}\boldsymbol{\Sigma}[\mathbf{0} \ \mathbf{R}]\mathbf{Q}^T$  and  $\mathbf{B} = \mathbf{V}\mathbf{M}[\mathbf{0} \ \mathbf{R}]\mathbf{Q}^T$ , where  $\mathbf{R} \in \mathbb{R}^{r \times r}$  is upper triangular and non-singular and  $\mathbf{U}, \mathbf{Q}, \mathbf{V}$  are all orthogonal matrices of appropriate dimensions,  $\boldsymbol{\Sigma}$  is a  $m \times r$  matrix with the property that  $\boldsymbol{\Sigma}^T\boldsymbol{\Sigma} = \text{diag}(\alpha_1^2, \dots, \alpha_r^2)$  with  $\alpha_i$  between zero and unity and  $\mathbf{M}$  is a  $p \times r$  matrix with the property the  $\mathbf{M}^T\mathbf{M} = \text{diag}(\beta_1^2, \dots, \beta_r^2)$  with  $\beta_i$  between zero and unity. The ratios  $\alpha_i/\beta_i$  are the *generalised singular values* of the matrix pair  $(\mathbf{K}, \mathbf{B})$ . Some of these singular values may equal zero or infinity. The GSVD has the added property that  $\boldsymbol{\Sigma}^T\boldsymbol{\Sigma} + \mathbf{M}^T\mathbf{M} = \mathbf{I}_r$ , the  $r \times r$  identity matrix.

For all cases studied here  $\mathbf{K}$  has full row rank equal to  $m$  with  $m \ll n$ ,  $\mathbf{B}$  is a singular square matrix ( $p = n$ ) with  $\text{rank}(\mathbf{B}) = n - 3$  and the composite matrix  $\begin{pmatrix} \mathbf{K} \\ \mathbf{B} \end{pmatrix}$  has full column rank  $r = n$ . The matrix  $\mathbf{R}$  is then  $n \times n$  and nonsingular. We may therefore define the nonsingular square matrix  $\mathbf{X} = \mathbf{Q}\mathbf{R}^{-1}$  with the properties that  $\mathbf{K}\mathbf{X} = \mathbf{U}\boldsymbol{\Sigma}$ ,  $\mathbf{B}\mathbf{X} = \mathbf{V}\mathbf{M}$ , and  $\mathbf{X}^T\mathbf{K}^T\mathbf{K}\mathbf{X} = \boldsymbol{\Sigma}^T\boldsymbol{\Sigma}$ ,  $\mathbf{X}^T\mathbf{B}^T\mathbf{B}\mathbf{X} = \mathbf{M}^T\mathbf{M}$ . The matrices  $\boldsymbol{\Sigma}$  and  $\mathbf{M}$  may be written

$$\boldsymbol{\Sigma} = \begin{pmatrix} \mathbf{I}_3 & \mathbf{0} & \mathbf{0} \\ \mathbf{0} & \mathbf{C} & \mathbf{0} \end{pmatrix}, \quad \mathbf{M} = \begin{pmatrix} \mathbf{0} & \mathbf{S} & \mathbf{0} \\ \mathbf{0} & \mathbf{0} & \mathbf{I}_{n-m} \\ \mathbf{0} & \mathbf{0} & \mathbf{0} \end{pmatrix},$$

where  $\mathbf{C} = \text{diag}(c_{ii})$  and  $\mathbf{S} = \text{diag}(s_{ii})$  with  $\mathbf{C}^2 + \mathbf{S}^2 = \mathbf{I}_{m-3}$  and  $c_{ii} = \alpha_{3+i}$  and  $s_{ii} = \beta_{3+i}$  for  $i = 1, \dots, m - 3$ .

#### 1.1. Determining the solution $\mathbf{f}$

To solve the equation  $(\mathbf{K}^T\mathbf{K} + \lambda^2\mathbf{B}^T\mathbf{B})\mathbf{f} = \mathbf{K}^T\boldsymbol{\rho}$  for a given value of  $\lambda$ , we apply the transformation  $\mathbf{X}$  to our equation and define a change of basis  $\mathbf{f} = \mathbf{X}\mathbf{g}$ , to give

$$\mathbf{X}^T(\mathbf{K}^T\mathbf{K} + \lambda^2\mathbf{B}^T\mathbf{B})\mathbf{X}\mathbf{g} = \mathbf{X}^T\mathbf{K}^T\boldsymbol{\rho}.$$

With the identities defined previously we then have the diagonalised equation

$$\Sigma^T \Sigma + \lambda^2 \mathbf{M}^T \mathbf{M} \mathbf{g} = \Sigma^T \mathbf{U}^T \boldsymbol{\rho}.$$

Equating components on the right and left hand sides gives

$$\begin{aligned} g_i &= \mathbf{U}_i^T \boldsymbol{\rho}, & i &= 1, 2, 3, \\ g_i &= (\alpha_i / (\alpha_i^2 + \lambda^2 \beta_i^2)) (\mathbf{U}_i^T \boldsymbol{\rho}), & i &= 4, \dots, m, \\ g_i &= 0, & i &= m+1, \dots, n, \end{aligned}$$

where  $\mathbf{U}_i$  denotes the  $i$ th column of  $\mathbf{U}$ . The solution is then given by  $\mathbf{f} = \mathbf{X} \mathbf{g}$ .

### 1.2. Calculating $\|\mathbf{B} \mathbf{f}\|$

Using the change of basis  $\mathbf{f} = \mathbf{X} \mathbf{g}$  we find that  $\|\mathbf{B} \mathbf{f}\| = \|\mathbf{B} \mathbf{X} \mathbf{g}\| = \|\mathbf{M} \mathbf{g}\|$ . The components of this vector are then given by

$$\begin{aligned} (\mathbf{M} \mathbf{g})_i &= (\alpha_i \beta_i / (\alpha_i^2 + \lambda^2 \beta_i^2)) (\mathbf{U}_i^T \boldsymbol{\rho}), & i &= 1, \dots, m-3, \\ (\mathbf{M} \mathbf{g})_i &= 0, & i &= m-2, \dots, n. \end{aligned}$$

and the norm follows directly.

### 1.3. Calculating the residual norm

By the properties of the GSVD and with the change of basis  $\mathbf{f} = \mathbf{X} \mathbf{g}$ , we have  $\boldsymbol{\epsilon} = \boldsymbol{\rho} - \mathbf{K} \mathbf{f} = \boldsymbol{\rho} - \mathbf{U} \Sigma \mathbf{g}$ , and it follows that  $\|\boldsymbol{\epsilon}\| = \|\mathbf{U}^T \boldsymbol{\epsilon}\| = \|\mathbf{U}^T \boldsymbol{\rho} - \Sigma \mathbf{g}\|$  by the orthogonality of  $\mathbf{U}$ . The non-zero components of  $\mathbf{U}^T \boldsymbol{\rho} - \Sigma \mathbf{g}$  are given by  $(1 - (\alpha_i^2 / (\alpha_i^2 + \lambda^2 \beta_i^2))) (\mathbf{U}_i^T \boldsymbol{\rho})$ ,  $i = 3, \dots, m$ , and the norm again follows directly.

## Appendix A. Pseudocode

This pseudocode outlines 4 key procedures for this study:

- Computation of the solution norm  $\|\mathbf{B} \mathbf{f}\|$ .  
*Inputs need to include the matrices  $\mathbf{K}$ ,  $\mathbf{B}$ ,  $\boldsymbol{\rho}$ , and  $\lambda$ .*
- Computation of the residual norm  $\|\boldsymbol{\epsilon}\|$ .  
*Same inputs as above.*
- Computation of the solution  $\mathbf{f}$ .  
*Same inputs as above.*
- Determination of  $\lambda$  that satisfies  $\|\boldsymbol{\epsilon}\| = \sqrt{n} \delta$ .  
*Inputs need to include  $\mathbf{K}$ ,  $\mathbf{B}$ ,  $\boldsymbol{\rho}$ , the length  $v$  of an initial  $\boldsymbol{\Lambda}$  vector with lower and upper bounds, delta, a tolerance ( $tol$ ) and maximum number of iterations ( $maxIter$ ).*

For all of these algorithms we assume the outputs of the GSVD as defined by its implementation in LAPACK (Anderson et al. 1999). For the benefit of com-

pletion we also include the code for the case  $m \geq r$  (not detailed above, but can also be derived from GSVD properties as defined in Anderson et al. (1999)).

---

**Algorithm 1** Compute  $\|\mathbf{B}\mathbf{f}\|$

---

```

1: procedure COMPUTESOLUTIONNORM( $\mathbf{K}, \mathbf{B}, \boldsymbol{\rho}, \lambda$ )
2:   compute GSVD( $\mathbf{K}, \mathbf{B}$ )
3:   filter  $\leftarrow \frac{\alpha}{\alpha^2 + \lambda^2 \beta^2}$ 
4:   if  $m \geq r$  then
5:     for  $i$  from 1 to  $l$  do
6:        $(\mathbf{B}\mathbf{f})_i \leftarrow (\text{filter} \cdot \beta_i) \cdot (\mathbf{U}_i^T \boldsymbol{\rho})$ 
7:   else
8:     for  $i$  from 1 to  $m$  do
9:        $(\mathbf{B}\mathbf{f})_i \leftarrow (\text{filter} \cdot \beta_i) \cdot (\mathbf{U}_i^T \boldsymbol{\rho})$ 
10:  return  $\|\mathbf{B}\mathbf{f}\|$ 

```

---



---

**Algorithm 2** Compute  $\|\boldsymbol{\epsilon}\|$

---

```

1: procedure COMPUTERESIDUALNORM( $\mathbf{K}, \mathbf{B}, \boldsymbol{\rho}, \lambda$ )
2:   compute GSVD( $\mathbf{K}, \mathbf{B}$ )
3:   filter  $\leftarrow \frac{\alpha}{\alpha^2 + \lambda^2 \beta^2}$ 
4:   if  $m \geq r$  then
5:     for  $i$  from 1 to  $r$  do
6:        $\epsilon_i \leftarrow (1 - \text{filter} \cdot \alpha_i) \cdot (\mathbf{U}_i^T \boldsymbol{\rho})$ 
7:     for  $i$  from  $r+1$  to  $m$  do
8:        $\epsilon_i \leftarrow \cdot (\mathbf{U}_i^T \boldsymbol{\rho})$ 
9:   else
10:    for  $i$  from 1 to  $m$  do
11:       $\epsilon_i \leftarrow (1 - \text{filter} \cdot \alpha) \cdot (\mathbf{U}_i^T \boldsymbol{\rho})$ 
12:  return  $\|\boldsymbol{\epsilon}\|$ 

```

---

---

**Algorithm 3** Compute BRDF kernel weights  $\mathbf{f}$  given  $\lambda$

---

```

1: procedure COMPUTEBRDF( $\mathbf{K}, \mathbf{B}, \boldsymbol{\rho}, \lambda$ )
2:   compute GSVD( $\mathbf{K}, \mathbf{B}$ )
3:   filter  $\leftarrow \frac{\alpha}{\alpha^2 + \lambda^2 \beta^2}$ 
4:   if  $n > r$  then
5:      $R \leftarrow \begin{pmatrix} \mathbf{I}_{n-r} & \mathbf{0}_{n-r,r} \\ \mathbf{0}_{r,n-r} & \mathbf{R} \end{pmatrix}$ 
6:    $\mathbf{X} \leftarrow \mathbf{Q}\mathbf{R}^{-1}$ 
7:   if  $m \geq r$  then
8:     for  $i$  from  $(n - r + 1)$  to  $n$  do
9:       idx  $\leftarrow i - (n - r)$ 
10:       $g_i \leftarrow \text{filter}_{idx} \cdot (\mathbf{U}_{idx}^T \boldsymbol{\rho})$ 
11:   else
12:     for  $i$  from  $(n - r + 1)$  to  $(n - r + m)$  do
13:       idx  $\leftarrow i - (n - r)$ 
14:        $g_i \leftarrow \text{filter}_{idx} \cdot (\mathbf{U}_{idx}^T \boldsymbol{\rho})$ 
15:    $\mathbf{f} \leftarrow \mathbf{X}\mathbf{g}$ 
16:   return  $\mathbf{f}$ 

```

---



---

**Algorithm 4** Compute  $\lambda$  that matches  $\|\epsilon\| = \sqrt{n}\delta$

---

```

1: procedure BISECTION( $\mathbf{K}, \mathbf{B}, \boldsymbol{\rho}, v, \text{lower}, \text{upper}, \delta, \text{tol}, \text{maxIter}$ )
2:    $\Lambda \leftarrow \text{create logarithmic sequence}(\text{lower}, \text{upper})$  of length  $v$ 
3:    $\Lambda \leftarrow \text{pad } 0 \text{ to } \Lambda$ 
4:   for  $i$  from 1 to  $v + 1$  do
5:     lambdaNorm $_i \leftarrow \text{COMPUTERESIDUALNORM}(\mathbf{K}, \mathbf{B}, \boldsymbol{\rho}, \Lambda_i)$ 
6:    $n \leftarrow \text{length of } \boldsymbol{\rho}$ 
7:   negIndex  $\leftarrow$  which indices lambdaNorm  $< \sigma$ 
8:   posIndex  $\leftarrow$  which indices lambdaNorm  $> \sigma$ 
9:   if is empty negIndex or posIndex then return -1
10:  else
11:     $l \leftarrow \text{length of negIndex}$ 
12:     $a \leftarrow \text{negIndex}_l$ 
13:     $b \leftarrow \text{posIndex}_1$ 
14:    iter  $\leftarrow 1$ 
15:    while iter  $\leq \text{maxIter}$  do
16:       $c \leftarrow (a + b)/2$ 
17:      aNorm  $\leftarrow \text{COMPUTERESIDUALNORM}(\mathbf{K}, \mathbf{B}, \boldsymbol{\rho}, a)$ 
18:      bNorm  $\leftarrow \text{COMPUTERESIDUALNORM}(\mathbf{K}, \mathbf{B}, \boldsymbol{\rho}, b)$ 
19:      cNorm  $\leftarrow \text{COMPUTERESIDUALNORM}(\mathbf{K}, \mathbf{B}, \boldsymbol{\rho}, c)$ 
20:      if  $(\text{cNorm} - \sqrt{n} \delta) = 0$  or  $(b - a)/2 < \text{tol}$  then return  $c$ 
21:      iter  $\leftarrow \text{iter} + 1$ 
22:      if sign(cNorm) = sign(aNorm) then
23:         $a \leftarrow c$ 
24:      else  $b \leftarrow c$ 

```

---

---

**Algorithm 5** Define a BRDF solution  $\mathbf{f}$ 

---

```
1: procedure SOLVEBRDF( $\mathbf{K}, \mathbf{B}, \boldsymbol{\rho}, v$ , lower, upper,  $\delta$ , tol, maxIter)
2:    $\lambda \leftarrow \text{BISECTION}(\mathbf{K}, \mathbf{B}, \boldsymbol{\rho}, v$ , lower, upper,  $\delta$ , tol, maxIter)
3:    $\mathbf{f} \leftarrow \text{COMPUTESOLUTION}(\mathbf{K}, \mathbf{B}, \boldsymbol{\rho}, \lambda)$ 
```

---

## References

- Anderson, E., Z. Bai, C. Bischof, S. Blackford, J. Demmel, J. Dongarra, J. Du Croz, et al. 1999. *LAPACK Users' Guide*. 3rd ed. Philadelphia, PA: Society for Industrial and Applied Mathematics.
- Bai, Zhaojun. 1992. "The CSD, GSVD, Their Applications and Computations." In *IMA Preprints Series*, Vol. 958, 3–5. University of Minnesota.
- Golub, Gene H., and C. Van Loan. 2014. *Matrix Computations*. 4th ed. Johns Hopkins University Press.
- Hansen, P. 1992. "Analysis of Discrete Ill-Posed Problems by Means of the L-Curve." *SIAM Review* 34 (4): 561–580.
- Hansen, P., and D. O'Leary. 1993. "The Use of the L-Curve in the Regularization of Discrete Ill-Posed Problems." *SIAM Journal on Scientific Computing* 14 (6): 1487–1503.
- Hansen, Per Christian. 1996. *Rank-Deficient and Discrete Ill-Posed Problems: Numerical Aspects of Linear Inversion*. SIAM Books, Philadelphia, PA.
